# Supplementary material for: Past fire dynamics inferred from polycyclic aromatic hydrocarbons and monosaccharide anhydrides in a stalagmite from the archaeological site of Mayapan, Mexico
Source: Copernicus journal article supplement (doi:10.5194/bg-20-3249-2023), 2023-08-08
Supplement: Supplementary file 1 [file bg-20-3249-2023-supplement.pdf]

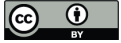

*Supplement of*

**Past fire dynamics inferred from polycyclic aromatic hydrocarbons and monosaccharide anhydrides in a stalagmite from the archaeological site of Mayapan, Mexico**

**Julia Homann et al.**

*Correspondence to:* Thorsten Hoffmann ([hoffmant@uni-mainz.de](mailto:hoffmant@uni-mainz.de))

The copyright of individual parts of the supplement might differ from the article licence.

### **Cave survey and stalagmite sample MAYA-22-7**

Because only very rough sketch maps were available, our team surveyed part of Cenote Ch'en Mul in August 2022 (Fig. S1). The cenote is in direct vicinity to the Kukulcan temple and the observatory (structure Q-152) (Brown, 2006). The cenote has been targeted in archaeological studies since the Carnegie Maya project 1952-1957 (Weeks and Masson, 2009).

- 5 The cave extends from the collapse doline in north-easterly then easterly direction and results from an ancient underground stream. The overburden is only between 7 and 8 m thick and facilitates rapid infiltration. Today, the passages are characterised by large breakdown and washed-in silt- and clay-rich unconsolidated sediment. The sediment on the cave floor is rich in organic material that has been washed in during floods. Several trenches have been excavated (and filled in afterwards) in the cenote and in the main cave passage, including a trench in 1953 and two trenches called 'Bernard Trench' (Brown, 2006).
- 10 Hell Chamber in the north-eastern section of the cave hosts a large colony of bats and manifold centipedes and millipedes, crickets and other cave dwellers. Maya potsherds are widespread in all passages, indicating human activity in the past. While the main passage is largely devoid of secondary cave carbonates (speleothems), the side passages are very well decorated with stalagmites and stalactites. During our visit in 2022 the cave showed active dripping in only few places, especially in the SE, where a small puddle was detected which might be linked to the water table.
- 15 Stalagmite MAYA-22-7 (Fig. 1) was found a few meters above the puddle. It was active (i.e., dripwater was falling onto it) when it was collected. The stalagmite was packed in a large plastic zip-lock bag before being detached from the growth spot to avoid contamination of the youngest surface.



### OxCal Deposition model input code

25 Below is the code used to run the OxCal Poisson-Process Deposition model. Boundaries were placed at 14 mm and 24 mm distance from top, where there are clearly visible detrital layers in the stalagmite. A top boundary at 0 mm distance from top was input as a date between 2010-2022 CE, uniform distribution.

```
Plot()
{
30 P_Sequence("M7",0.1,null,U(-2,2))
  {
    timescale="UTh";
    Boundary();
    Date("bh03",N(calBP(332),11.5))
35 {
    z=121;
    };
    Date("bh01",N(calBP(233),7))
40 {
    z=90.3;
    };
    Date("bh05",N(calBP(100),6.2))
    {
    z=53.3;
45 };
    Date("bh02",N(calBP(22),5.4))
    {
    z=27.3;
50 };
    Boundary("detrital_2")
    {
    z=24;
    };
    Boundary("detrital_1")
55 {
    z=14;
    };
    Date("bh04",N(calBP(-51),5.3))
    {
60 z=9.3;
    };
    Date("top",U(calBP(-72),calBP(-60)))
    {
    z=0;
65 };
    Boundary();
  };
};
```

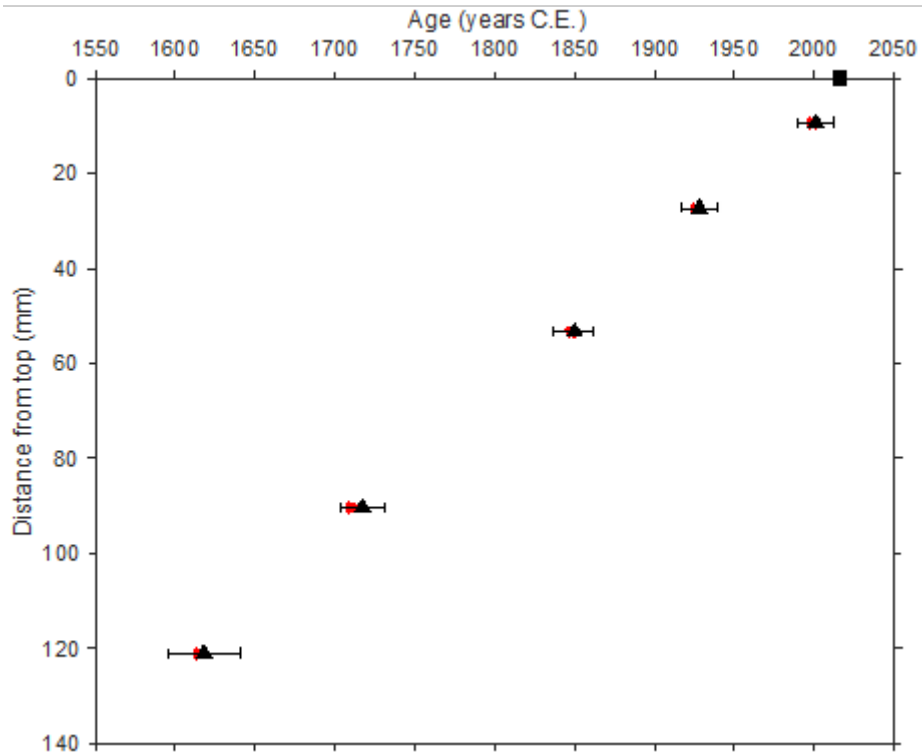

**Figure S2. Age-depth plot of stalagmite MAYA-22-7. Black triangles show the mean corrected U-Th age and error bars indicate the 95% confidence interval. Red x's mark the uncorrected U-Th ages. A black rectangle is placed between 2010-2022 C.E., marking the estimated top age of the stalagmite, collected in August 2022.**

**Table S1: U-Th isotope activity ratios, calculated age (years C.E.), and Monte Carlo derived 95% confidence interval on the age for the five stalagmite MAYA-22-7 U-Th samples. An initial  $^{230}\text{Th}/^{232}\text{Th}$  activity ratio range of 0.1-2 (uniform distribution) was used to correct the ages for initial detrital Th contamination. The  $^{234}\text{U}$  and  $^{230}\text{Th}$  half-lives used to calculate age are provided in Cheng et al. (2013).**

| Sample ID | Distance from top (mm) | $^{238}\text{U}$ (ppb) | $^{232}\text{Th}$ (ppb) | $(^{230}\text{Th}/^{232}\text{Th})$ measured | $(^{234}\text{U}/^{238}\text{U})$ measured | $(^{234}\text{U}/^{238}\text{U})$ 1s | $(^{230}\text{Th}/^{238}\text{U})$ measured | $(^{230}\text{Th}/^{238}\text{U})$ 1s | $(^{232}\text{Th}/^{238}\text{U})$ measured | $(^{232}\text{Th}/^{238}\text{U})$ 1s |
|-----------|------------------------|------------------------|-------------------------|----------------------------------------------|--------------------------------------------|--------------------------------------|---------------------------------------------|---------------------------------------|---------------------------------------------|---------------------------------------|
| bh04      | 9.3                    | 1097                   | 0.04                    | 17                                           | 1.0236                                     | 0.0004                               | 0.00022                                     | 0.00005                               | 1.254E-05                                   | 3E-08                                 |
| bh02      | 27.3                   | 1322                   | 0.09                    | 43                                           | 1.0369                                     | 0.0006                               | 0.00092                                     | 0.00005                               | 2.134E-05                                   | 3E-08                                 |
| bh05      | 53.3                   | 1202                   | 0.07                    | 92                                           | 1.0435                                     | 0.0005                               | 0.00167                                     | 0.00006                               | 1.805E-05                                   | 4E-08                                 |
| bh01      | 90.3                   | 1181                   | 0.22                    | 50                                           | 1.0338                                     | 0.0005                               | 0.00296                                     | 0.00006                               | 5.905E-05                                   | 5E-08                                 |
| bh03      | 121.0                  | 1133                   | 0.11                    | 119                                          | 1.0330                                     | 0.0005                               | 0.00386                                     | 0.00011                               | 3.237E-05                                   | 7E-08                                 |

| Sample ID | Year measured (years CE) | Initial $(^{230}\text{Th}/^{232}\text{Th})$ | Age uncorrected (years CE) | 95% CI lower | 95% CI upper | Age corrected (years CE) | 95% CI lower | 95% CI upper |
|-----------|--------------------------|---------------------------------------------|----------------------------|--------------|--------------|--------------------------|--------------|--------------|
| bh04      | 2022.83                  | 0.1-2                                       | 1999                       | 1989         | 2010         | 2001                     | 1990         | 2011         |
| bh02      | 2022.83                  | 0.1-2                                       | 1926                       | 1915         | 1936         | 1928                     | 1918         | 1939         |
| bh05      | 2022.83                  | 0.1-2                                       | 1848                       | 1836         | 1861         | 1850                     | 1838         | 1863         |
| bh01      | 2022.83                  | 0.1-2                                       | 1710                       | 1698         | 1722         | 1717                     | 1703         | 1731         |
| bh03      | 2022.83                  | 0.1-2                                       | 1615                       | 1592         | 1637         | 1618                     | 1595         | 1641         |

**Table S2: OxCal modelled ages of the 10 biomarker samples.**

| Sample # | Position   | Distance from top (mm) | OxCal modelled mean age (years CE) | Error 2 $\sigma$ (years) |
|----------|------------|------------------------|------------------------------------|--------------------------|
| 4        | pit top    | 0.5                    | 2015                               | 6                        |
| 4        | pit bottom | 4.1                    | 2009                               | 8                        |
| 3        | pit top    | 4.6                    | 2009                               | 8                        |
| 3        | pit bottom | 9.1                    | 2001                               | 10                       |
| 5        | pit top    | 9.6                    | 2000                               | 11                       |
| 5        | pit bottom | 13.0                   | 1994                               | 19                       |
| 2        | pit top    | 15.0                   | 1986                               | 21                       |
| 6        | pit top    | 15.0                   | 1986                               | 21                       |
| 6        | pit bottom | 19.1                   | 1965                               | 19                       |
| 2        | pit bottom | 19.1                   | 1965                               | 19                       |
| 8        | pit top    | 23.2                   | 1944                               | 17                       |
| 8        | pit bottom | 23.2                   | 1944                               | 17                       |
| 9        | pit top    | 25.1                   | 1936                               | 15                       |
| 9        | pit bottom | 30.8                   | 1918                               | 11                       |
| 1        | pit top    | 35.6                   | 1903                               | 11                       |
| 1        | pit bottom | 39.1                   | 1892                               | 11                       |
| 10       | pit top    | 44.8                   | 1874                               | 11                       |
| 10       | pit bottom | 50.8                   | 1855                               | 11                       |
| 11       | pit top    | 70.3                   | 1788                               | 12                       |
| 11       | pit bottom | 78.7                   | 1759                               | 12                       |

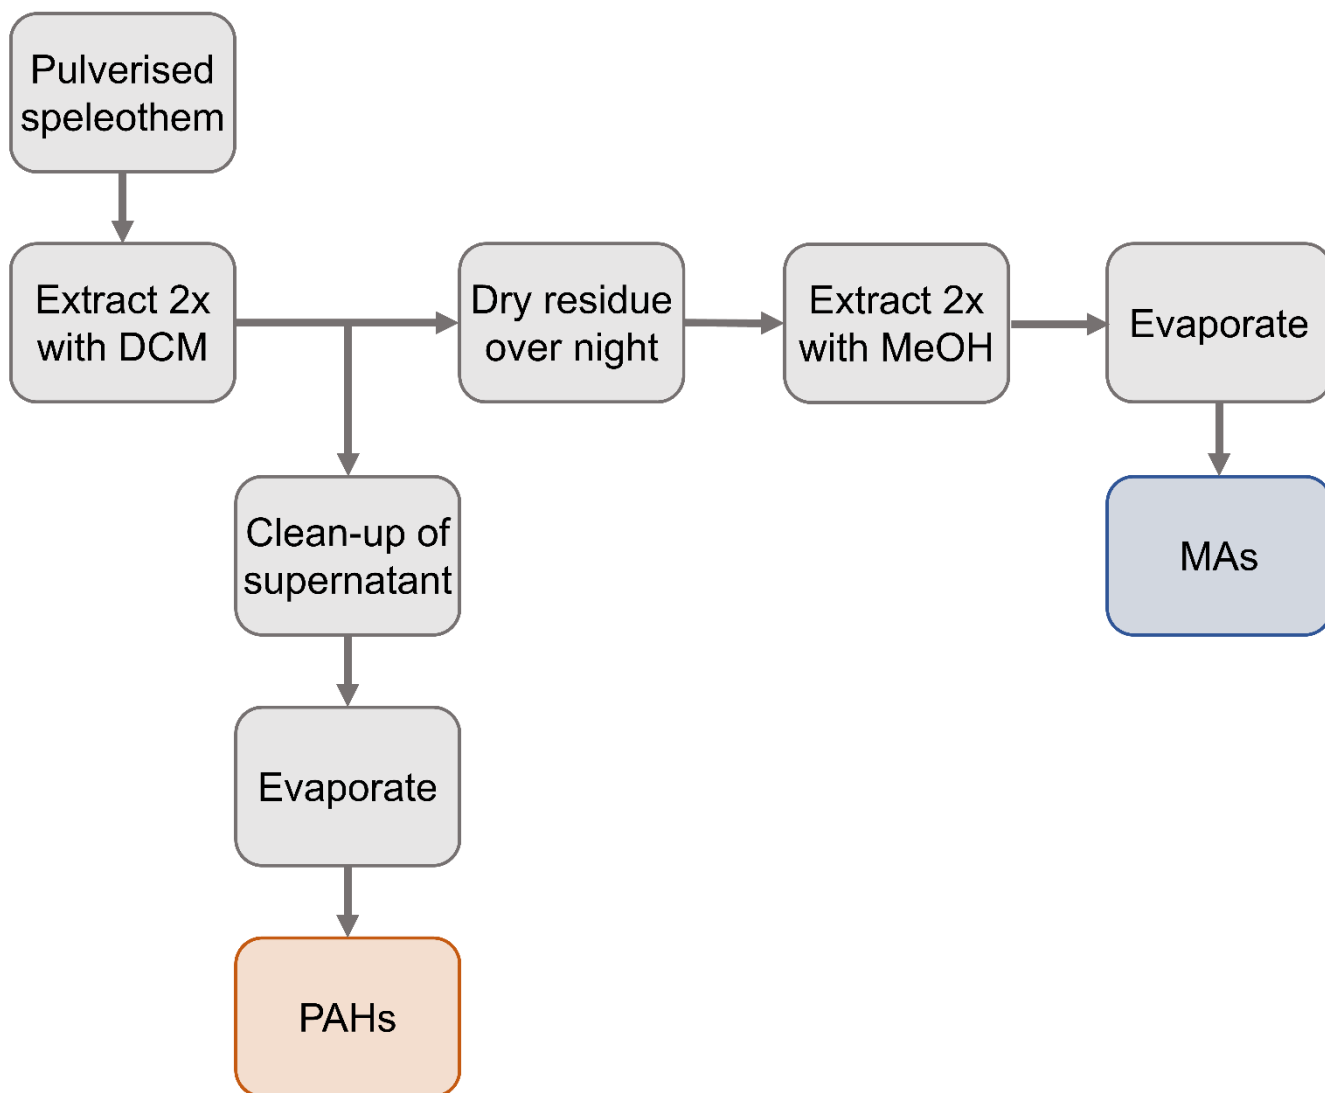

Figure S3: Flow chart of the sample preparation method.



**Table S3: Determined d-PAH and <sup>13</sup>C-levoglucosan recoveries (%) of the 10 samples from stalagmite MAYA-22-7 from Cenote Ch'en Mul, Mayapan.**

| Age<br>(Year CE)* | 2010-2015  | 2000-2010 | 1995-2000   | 1945-1985 | 1945-1965  | 1920-1935 | 1890-1905   | 1855-1875 | 1760-1790   | 1640-1650  |
|-------------------|------------|-----------|-------------|-----------|------------|-----------|-------------|-----------|-------------|------------|
| Sample #          | 4          | 3         | 5           | 2         | 6          | 8         | 9           | 1         | 10          | 11         |
| d-NAP             | 48.1 ±9.8  | 57.6 ±4.2 | 101.7 ±36.4 | 48.9 ±3.5 | 67.4 ±19.7 | 41.6 ±8.2 | 82.8 ±26.8  | 66.6 ±5.0 | 97.2 ±27.0  | 60.8 ±16.5 |
| d-ACE             | 51.6 ±10.5 | 47.7 ±3.5 | 120.7 ±43.1 | 40.7 ±2.9 | 77.3 ±22.6 | 45.5 ±9.0 | 93.8 ±30.3  | 56.7 ±4.3 | 101.1 ±28.0 | 57.4 ±15.5 |
| d-PHE             | 66.9 ±13.6 | 76.8 ±5.6 | 127.2 ±45.5 | 66.6 ±4.8 | 89.6 ±26.2 | 46.4 ±9.1 | 100.3 ±32.4 | 88.7 ±6.7 | 110.0 ±30.5 | 69.7 ±18.9 |
| 13C-LEV           | 70.7 ±7.6  | 66.8 ±6.9 | 79.2 ±1.8   | 66.1 ±4.5 | 74.2 ±6.5  | 61.8 ±4.7 | 82.9 ±10.2  | 80.7 ±2.2 | 71.4 ±17.2  | 78.1 ±5.2  |

\*: Start and end dates have errors of ± 6-20 years (95 % confidence interval)

**Table S4: Determined PAH and MA concentrations (ng g<sup>-1</sup>) of the 10 samples from stalagmite MAYA-22-7 from Cenote Ch'en Mul, Mayapan.**

| Age<br>(Year CE)* | 2010-2015 | 2000-2010  | 1995-2000  | 1945-1985  | 1945-1965 | 1920-1935   | 1890-1905 | 1855-1875  | 1760-1790  | 1640-1650   |
|-------------------|-----------|------------|------------|------------|-----------|-------------|-----------|------------|------------|-------------|
| Sample #          | 4         | 3          | 5          | 2          | 6         | 8           | 9         | 1          | 10         | 11          |
| NAP               | 1.4 ±0.3  | < LOD      | 3.2 ±1.1   | 2.8 ±0.2   | 7.1 ±2.1  | 1.4 ±0.3    | 5.2 ±1.7  | 1.2 ±0.1   | 4.0 ±1.1   | 2.2 ±0.6    |
| ACY               | 0.1 ±0.02 | 0.3 ±0.02  | 0.1 ±0.04  | 0.5 ±0.04  | 0.3 ±0.1  | < LOD       | 0.3 ±0.1  | 0.1 ±0.01  | 0.2 ±0.1   | < LOD       |
| ACE               | 0.2 ±0.05 | 0.2 ±0.01  | 0.5 ±0.2   | 0.3 ±0.02  | 0.7 ±0.2  | 0.2 ±0.05   | 0.5 ±0.2  | 0.2 ±0.02  | 0.4 ±0.1   | 0.3 ±0.1    |
| FLN               | 0.4 ±0.1  | 0.4 ±0.03  | 0.6 ±0.2   | 0.8 ±0.1   | 0.7 ±0.2  | 0.2 ±0.05   | 0.6 ±0.2  | 0.4 ±0.03  | 0.5 ±0.1   | 0.4 ±0.1    |
| PHE               | 3.8 ±0.8  | 3.8 ±0.3   | 3.9 ±1.4   | 7.20 ±0.5  | 5.7 ±1.7  | 1.8 ±0.4    | 4.0 ±1.3  | 3.3 ±0.3   | 3.9 ±1.1   | 2.2 ±0.6    |
| ANT               | 0.1 ±0.01 | 1.0 ±0.1   | 0.1 ±0.03  | 2.1 ±0.2   | < LOD     | < LOD       | < LOD     | 0.7 ±0.1   | < LOD      | < LOD       |
| FLT               | < LOD     | < LOD      | 0.7 ±0.3   | < LOD      | < LOD     | < LOD       | 0.7 ±0.2  | < LOD      | 0.7 ±0.2   | < LOD       |
| PYR               | 0.4 ±0.1  | 0.5 ±0.004 | 0.6 ±0.2   | 0.9 ±0.1   | 0.9 ±0.3  | < LOD       | 0.5 ±0.2  | 0.7 ±0.05  | 0.5 ±0.1   | 0.3 ±0.1    |
| RET               | < LOD     | < LOD      | 0.8 ±0.3   | < LOD      | < LOD     | < LOD       | 0.4 ±0.1  | < LOD      | < LOD      | < LOD       |
| BAA               | < LOD     | < LOD      | < LOD      | < LOD      | < LOD     | < LOD       | < LOD     | < LOD      | < LOD      | < LOD       |
| CHR               | < LOD     | < LOD      | < LOD      | < LOD      | < LOD     | < LOD       | < LOD     | < LOD      | < LOD      | < LOD       |
| BBF               | < LOD     | < LOD      | < LOD      | < LOD      | < LOD     | < LOD       | < LOD     | < LOD      | < LOD      | < LOD       |
| BAP               | < LOD     | < LOD      | < LOD      | < LOD      | < LOD     | < LOD       | < LOD     | < LOD      | < LOD      | < LOD       |
| INP               | < LOD     | < LOD      | < LOD      | < LOD      | < LOD     | < LOD       | < LOD     | < LOD      | < LOD      | < LOD       |
| DBA               | 0.1 ±0.02 | 0.0 ±0.001 | 0.2 ±0.1   | 0.1 ±0.004 | < LOD     | 0.02 ±0.004 | 0.1 ±0.03 | 0.1 ±0.004 | 0.04 ±0.01 | < LOD       |
| DPE               | < LOD     | < LOD      | < LOD      | < LOD      | < LOD     | < LOD       | < LOD     | < LOD      | < LOD      | < LOD       |
| MAN               | 0.3 ±0.03 | 0.1 ±0.02  | 0.3 ±0.02  | 0.4 ±0.08  | 0.3 ±0.06 | 0.3 ±0.01   | < LOD     | 0.1 ±0.02  | 0.2 ±0.01  | 0.3 ±0.0003 |
| GAL               | 0.3 ±0.1  | 0.1 ±0.02  | 0.2 ±0.003 | 0.4 ±0.07  | 0.7 ±0.01 | 0.3 ±0.01   | 0.1 ±0.02 | 0.1 ±0.01  | 0.2 ±0.03  | 0.3 ±0.01   |

|     |           |           |            |           |           |           |           |           |           |           |
|-----|-----------|-----------|------------|-----------|-----------|-----------|-----------|-----------|-----------|-----------|
| LEV | 1.8 ±0.20 | 0.6 ±0.09 | 2.3 ±0.001 | 3.4 ±0.05 | 5.7 ±0.67 | 1.9 ±0.02 | 1.9 ±0.14 | 0.8 ±0.02 | 2.0 ±0.42 | 2.0 ±0.07 |
|-----|-----------|-----------|------------|-----------|-----------|-----------|-----------|-----------|-----------|-----------|

---

95 \*: Start and end dates have errors of ± 6-20 years (95 % confidence interval)

**Table S5: Calculated sums and diagnostic ratios of the 10 samples from stalagmite MAYA-22-7 from Cenote Ch'en Mul, Mayapan.**

| Age (Year CE)*    | 2010-<br>2015 | 2000-<br>2010 | 1995-<br>2000 | 1945-<br>1985 | 1945-<br>1965 | 1920-<br>1935 | 1890-<br>1905 | 1855-<br>1875 | 1760-<br>1790 | 1640-<br>1650 |
|-------------------|---------------|---------------|---------------|---------------|---------------|---------------|---------------|---------------|---------------|---------------|
| Sample #          | 4             | 3             | 5             | 2             | 6             | 8             | 9             | 1             | 10            | 11            |
| Σ15†              | 6.4 ±1.3      | 6.2 ±0.5      | 9.9 ±3.5      | 14.7 ±1.1     | 15.4 ±4.5     | 3.8 ±0.7      | 11.9 ±3.8     | 6.7 ±0.5      | 10.3 ±2.8     | 5.4 ±1.5      |
| LMW‡              | 6.0 ±1.2      | 5.6 ±0.4      | 9.0 ±3.2      | 13.8 ±1.0     | 14.5 ±4.2     | 3.7 ±0.7      | 11.3 ±3.7     | 6.0 ±0.5      | 9.7 ±1.4      | 5.0 ±1.4      |
| HMW◊              | 0.4 ±0.1      | 0.5 ±0.04     | 0.9 ±0.3      | 0.9 ±0.1      | 0.9 ±0.3      | ±0.004        | 0.6 ±0.2      | 0.7 ±0.1      | 0.5 ±0.1      | 0.3 ±0.1      |
| LMW/HMW           | 13.6 ±5.5     | 10.4 ±1.5     | 10.3 ±7.3     | 14.9 ±2.1     | 15.8 ±9.2     | ±69.1         | ±12.5         | 8.5 ±1.3      | ±10.5         | 14.7 ±8.0     |
| PHE/ANT           | ±30.3         | 4.0 ±0.6      | ±30.7         | 3.4 ±0.5      | NA            | NA            | NA            | 4.8 ±0.7      | NA            | NA            |
| ANT/(ANT+PHE)     | ±0.01         | 0.2 ±0.03     | ±0.02         | 0.2 ±0.03     | NA            | NA            | NA            | 0.2 ±0.03     | NA            | NA            |
| RET/(RET+PHE+ANT) | NA            | NA            | ±0.18         | NA            | NA            | NA            | ±0.06         | NA            | NA            | NA            |
| LEV/(LEV+Σ15)     | 0.5 ±0.1      | 0.2 ±0.04     | 0.4 ±0.1      | 0.4 ±0.04     | 0.5 ±0.2      | 0.6 ±0.1      | 0.3 ±0.1      | 0.3 ±0.03     | 0.4 ±0.2      | 0.5 ±0.2      |
| LEV/MAN           | 5.9 ±1.2      | 9.7 ±3.8      | 8.0 ±0.6      | 9.5 ±2.3      | 18.8 ±5.7     | 7.4 ±0.5      | NA            | 9.1 ±2.1      | 8.8 ±2.5      | 6.0 ±0.2      |
| LEV/(MAN+GAL)     | 3.3 ±0.8      | 4.7 ±3.0      | 4.6 ±0.4      | 4.8 ±2.1      | 5.9 ±1.8      | 3.7 ±0.4      | ±4.96         | 5.4 ±2.0      | 4.7 ±2.1      | 3.1 ±0.2      |

\*: Start and end dates have errors of ± 6-20 years (95 % confidence interval) †: Sum of non-alkylated PAHs; ‡: Sum of two and three-ring PAHs; ◊: Sum of four and five-ring PAHs

## 100 References

- Brown, C. T.: Water Sources at Mayapan, Yucatan, Mexico, in: *Precolonial Water Management: Ideology, Ritual, and Power*, edited by: Lucero, L. J., University of Arizona Press, Washington, D. C., 171–186, <https://doi.org/10.2307/j.ctv2vt02c0.14>, 2006.
- Weeks, J. M. and Masson, M.: *The Carnegie Maya: II: Carnegie Institution of Washington current reports, 1952-1957*, University Press of Colorado, Boulder, Colo, 625 pp., 2009.
